# Supplementary material
Source: MDPI journal article supplement (https://www.mdpi.com/2227-7099/5/1/10)
Supplement: s1 [file s1]

## Sheet: Table S1 - Energy SUT 2003
	Coke ovens	Oil refineries	Gas works	Coal plant	Thermoelectric power plant	Independent power producer	Cogeneration	Nuclear plants	Hydroelectric power plant	Geothermal power plant	Wind power plant	Solar energy power plant	Electric grid	Distribution of imported carriers	Biomass distribution		Primary	Iron and steel	Chemical	Sugar	Cement	Mining	Paper and pulp	Glass	Beer	Fertilizers	Automotive	Water	Construction	Rubber	Petrochemical	Road transport	Transport aviation	Transport navigation	Rail transport	Transport electric	Tobacco	Other industry	Commercial	Services public	Residential		Aggregated finald demand	Exports	Statistical differences	Stock changes	Total
USE
Coal	281.585			269.738																																							0	0.018863	1e-06	40.2217	591.564
Crude oil		2995.3																																									0	4455.09	104.9	53.2598	7608.55
Condensates		5.64989	125.517																																								0	0.297467	0.017839	0.302706	131.785
Natural gas raw			978.216		343.612	222.587	86.1639																																				0			53.5423	1684.12
Nuclear energy								114.871																																			0				114.871
Hydro							0.0319		71.111																																		0				71.1429
Geothermal										134.588																																	0				134.588
Solar energy							0.0297					2.762																															0				2.7917
Wind energy											0.02																																0				0.02
Biogas							0.425																																				0				0.425
Peat							45.76								42.08																												0				87.84
Wood															267.028																												0				267.028
Coal distributed							12.2088														5.7884																	212.551					218.339				230.548
Coke																		49.277																									49.277	8.409		-6.03307	51.6529
LPG							0.014256										7.977	0.005	0.639			2.313	0.282	0.091	0.395		0.241	0.803		0.01		55.917						33.498	63.747		289.716		455.634	0.419517		6.43516	462.503
Gasoline																																1115.62	0.807					1.682					1118.11	131.402		30.4884	1280
Kerosene																	0.044																105.83					0.064			1.245		107.183	14.8743	-2.14295		119.914
Diesel					31.5508	1.6687	3.44345										70.386	0.962	3.999	0.045	0.077	3.982	0.833	0.104	0.076	0.096	0.346	2.585	6.129	1.021	0.36	395.612		28.687	21.862		0.002036	23.884	2.283				563.331	5.94853	1e-06	39.7222	645.665
Fueloil		95.712			633.774		23.8745											10.712	15.088	22.45	18.41	3.106	12.833	4.698	7.58			1.786	1.786	0.474				3.561			0.018975	42.688					145.191	48.4213	1e-06	-5.61411	941.359
Petroleum coke							7.68406											5.613	3.231		48.088																	2.912					59.844	0.010254	7.10543e-15	27.2289	94.7672
Natural Gas distributed			44.8642				0.53118											93.748	44.394		7.019	8.486	20.902	32.136	5.79	2.839	1.612	0.473	0.473	3.943	76.5684	0.703					0.2395	104.589	6.576		58.65		469.141			26.5229	541.059
Other oil derivatives																																											0				0
Coke imported														12.8759																																	12.8759
LPG imported														118.735																																	118.735
Gasoline imported														292.147																																	292.147
Kerosene imported														0																																	0
Diesel imported														19.0331																																	19.0331
Fueloil imported														45.5706																																	45.5706
Petroleum coke imported														68.7406																																	68.7406
Natural Gas imported														0																																	0
Other oil derivatives imported																																															0
Electricity coal													60.052																														0				60.052
Electricity thermoelectric													568.166																														0				568.166
Electricity nuclear													37.8																														0				37.8
Electricity hydro													71.111																														0				71.111
Electricity geothermal													22.62																														0				22.62
Electricity wind													0.0519																														0				0.0519
Electricity solar													0.0297																									0.128	1.06		1.574		2.762				2.7917
Electricity biogas													0.425																														0				0.425
Electricity peat													45.76																																		45.76
Electricity distributed					38.6604												27.07	18.856	17.142	2.734	28.277	17.147	10.261	3.785	2.5	0.65	5.803	2.747	1.426	1.334	4.874				0.131	3.866	0.176	275.534	46.237	22.136	143.5		636.186	12.4605			687.307
Electricity imported													0.394362																														0				0.394362
Peat distributed																				38.6			0.21															3.27					42.08				42.08
Wood distributed																																									267.02		267.02				267.02
Other biomass imported																																											0				0
Solar decentralized																																											0				0
Non-energy oil derivatives														0																	70.3942							111.27					181.664	3.46535	1.37668	0.20717	186.713
SUPPLY	Coke ovens	Oil refineries	Gas works	Coal plant	Thermoelectric power plant	Independent power producer	Cogeneration	Nuclear plants	Hydroelectric power plant	Geothermal power plant	Wind power plant	Solar energy power plant	Electric grid	Distribution of imported carriers	Biomass distribution		Domestic natural resources	Imports	Total
Carbón																	183.875	407.689	591.564
Petróleo crudo HC																	7608.65	0	7608.65
Condensados HC																	131.477	0.297	131.774
Gas natural HC																	1684.11		1684.11
Nucleoenergía																	114.871		114.871
Hidroenergía RW																	71.111		71.111
Geoenergía RW																	134.588		134.588
Energía solar RW																	2.762		2.762
Energía eólica RW																	0.02		0.02
Biogas RW																	0.425		0.425
Bagazo de caña BM																	87.84		87.84
Leña BM																	267.028		267.028
Carbón DISTRIBUIDO	230.548																		230.548
Coque de carbón RW	38.777													12.8759					51.6529
GLP HC		48.8923	295.116											118.735					462.743
Gasolinas y naftas HC		827.075	160.657											292.147					1279.88
Querosenos HC		116.243	3.6644											0					119.907
Diesel HC		626.633	0											19.0331					645.666
Combustóleo HC		895.706												45.5706					941.276
Coque de petróleo RW		26.0266												68.7406					94.7672
Gas seco HC		89.2484	451.798											0					541.047
Productos fosiles secundarios otros																			0
Coque de carbón RW imp																		12.8759	12.8759
GLP HC imp																		118.735	118.735
Gasolinas y naftas HC imp																		292.147	292.147
Querosenos Hcimp																		0	0
Diesel HC imp																		19.0331	19.0331
Combustóleo HC imp																		45.5706	45.5706
Coque de petróleo RW imp																		68.7406	68.7406
Gas seco HC imp																			0
Productos fosiles secundarios otros imp																			0
Electricidad carbon				60.052															60.052
Electricidad TE					423.749	118.962	25.4554												568.166
Electricidad Nucleo								37.8											37.8
Electricidad Hidro									71.111										71.111
Electricidad Geo										22.62									22.62
Electricidad Eolica							0.0319				0.02								0.0519
Electricidad Solar							0.0297					2.762							2.7917
Electricidad Biogas							0.425												0.425
Electricidad Bagazo							45.76												45.76
Electricidad distribuida													686.913						686.913
Electricidad Importada																		0.394362	0.394362
Bagazo de caña RW distribuida															42.08				42.08
Leña RW distribuida															267.028				267.028
BIOMASA SECUNDARIA IMPORTADA																			0
Solar RW																			0
Productos derivados de petroleo para uso no energetico		101.758	84.9557											0					186.713

## Sheet: Table S2 - Energy SUT 2008
	Coke ovens	Oil refineries	Gas works	Coal plant	Thermoelectric power plant	Independent power producer	Cogeneration	Nuclear plants	Hydroelectric power plant	Geothermal power plant	Wind power plant	Solar energy power plant	Electric grid	Distribution of imported carriers	Biomass distribution		Primary	Iron and steel	Chemical	Sugar	Cement	Mining	Paper and pulp	Glass	Beer	Fertilizers	Automotive	Water	Construction	Rubber	Petrochemical	Road transport	Transport aviation	Transport navigation	Rail transport	Transport electric	Tobacco	Other industry	Commercial	Services public	Residential		Aggregated finald demand	Exports	Statistical differences	Stock changes	Total
USE
Coal	288.464			236.888			1.1304																																				0	4.37709	1e-06	-4.19001	526.669
Crude oil		3147.24																																									0	3286.29	36.1857	50.9707	6520.68
Condensates		5.92881	85.5174																																								0	0	-0.115489	0.005239	91.336
Natural gas raw			912.617		346.73	534.544	135.301																																				0	37.2898		324.325	2290.81
Nuclear energy								106.635																																			0				106.635
Hydro							0.0323		140.01																																		0				140.042
Geothermal										159.874																																	0				159.874
Solar energy							0.068497					3.26																															0				3.3285
Wind energy											0.91																																0				0.91
Biogas							0.809																																				0				0.809
Peat							42.16								55.34																												0			1.62	99.12
Wood															262.049																												0				262.049
Coal distributed							6.30192														4.80932																	221.93					226.739				233.041
Coke																		47.0802																									47.0802	8.409		-6.03307	49.4561
LPG							0.534006										7.14672	0.008286	0.81623	0.000243		3.68827	0.483515	0.136699	0.136699		0.37	1.17		0.01		43.96						35.35	62.11		297.97		453.357	0.175483		9.52489	463.591
Gasoline																															1.53	1476.9	0.95					0.66					1480.04	128.284		33.9781	1642.3
Kerosene																	0.042089																129.56								0.83		130.432	11.4063	-6.38	2.30833	137.767
Diesel					9.77937	1.2261	3.72741										114.627	0.8791	4.33365	0.064489	0.122747	10.5872	1.4823	0.163721	0.140044	0.1517	0.59	3.24	10.47	1.69	0.46	579.16		38.66	25.83		0.002	21.12	3.54				817.314	14.0421	5.68434e-14	50.3773	896.466
Fueloil		85.0341			418.808		12.0744											7.98051	9.39324	10.8875	6.84549	2.86753	10.8991	3.80011	7.11639			1.54		0.52	0.21	0.5763		2.32			0.01	21.47					86.4361	138.894	-5e-06	15.4499	756.696
Petroleum coke							30.8639											5.94074	11.68		93.12			0.011346														3.04					113.792	1.57073	7.10543e-15	21.3732	167.6
Natural Gas distributed		93.7951	168.955				6.43808											103.952	45.9389		3.01149	7.05077	24.2855	40.4902	6.1401	3.29	2.21	0.57		4.15	92.97						0.3	115.13	8.79		30.35		488.629	37.2898		21.5511	816.658
Other oil derivatives																																											0				0
Coke imported														8.59506																																	8.59506
LPG imported														138.043																																	138.043
Gasoline imported														645.375																	1.53																645.375
Kerosene imported														9.69721																																	9.69721
Diesel imported														148.213																																	148.213
Fueloil imported														77.4363																																	77.4363
Petroleum coke imported														108.523																																	108.523
Natural Gas imported														0																																	0
Other oil derivatives imported																																															0
Electricity coal													64.04																														0				64.04
Electricity thermoelectric													657.136																														0				657.136
Electricity nuclear													35.29																														0				35.29
Electricity hydro													140.01																														0				140.01
Electricity geothermal													25.4																														0				25.4
Electricity wind													0.9423																														0				0.9423
Electricity solar													0.068497																									0.15	1.25		1.86		3.26				3.3285
Electricity biogas													0.809																														0				0.809
Electricity peat													42.16																																		42.16
Electricity distributed					43.5554												29.7797	27.3763	16.1186	3.01496	34.5921	20.6268	9.026	4.2598	3.2323	0.55	7.05	3.05	1.7	1.39	4.94				0.13	3.86	0.22	327.32	50.9		170.82		719.957	29.1746		-19.4	773.287
Electricity imported													1.42343																											25.46			25.46			-25	1.88343
Peat distributed																				51.31			0.24															3.79					55.34				55.34
Wood distributed																																									262.04		262.04				262.04
Other biomass imported																																											0				0
Solar decentralized																																											0				0
Non-energy oil derivatives														0																	71.569							107.101					178.67	3.40445	9.46504	0.130474	191.67
SUPPLY	Coke ovens	Oil refineries	Gas works	Coal plant	Thermoelectric power plant	Independent power producer	Cogeneration	Nuclear plants	Hydroelectric power plant	Geothermal power plant	Wind power plant	Solar energy power plant	Electric grid	Distribution of imported carriers	Biomass distribution		Domestic natural resources	Imports	Total
Carbón																	289.816	236.853	526.669
Petróleo crudo HC																	6520.85	0	6520.85
Condensados HC																	91.4462	0.297	91.7432
Gas natural HC																	2290.33		2290.33
Nucleoenergía																	106.635		106.635
Hidroenergía RW																	140.01		140.01
Geoenergía RW																	159.874		159.874
Energía solar RW																	3.26		3.26
Energía eólica RW																	0.91		0.91
Biogas RW																	0.425		0.425
Bagazo de caña BM																	99.13		99.13
Leña BM																	262.049		262.049
Carbón DISTRIBUIDO	233.043																		233.043
Coque de carbón RW	41.038													8.59506					49.6331
GLP HC		41.9185	283.725											138.043					463.686
Gasolinas y naftas HC		812.722	184.673											645.375					1642.77
Querosenos HC		127.702	0.366672											9.69721					137.765
Diesel HC		748.309	0											148.213					896.522
Combustóleo HC		679.252												77.4363					756.689
Coque de petróleo RW		59.0928												108.523					167.616
Gas seco HC		93.7951	212.624											0			510.247		816.666
Productos fosiles secundarios otros																			0
Coque de carbón RW imp																		8.59506	8.59506
GLP HC imp																		138.043	138.043
Gasolinas y naftas HC imp																		645.375	645.375
Querosenos Hcimp																		9.69721	9.69721
Diesel HC imp																		148.213	148.213
Combustóleo HC imp																		77.4363	77.4363
Coque de petróleo RW imp																		108.523	108.523
Gas seco HC imp																			0
Productos fosiles secundarios otros imp																			0
Electricidad carbon				64.04															64.04
Electricidad TE					309.86	273.625	73.6502												657.136
Electricidad Nucleo								35.29											35.29
Electricidad Hidro									140.01										140.01
Electricidad Geo										25.4									25.4
Electricidad Eolica							0.0323				0.91								0.9423
Electricidad Solar							0.068497					3.26							3.3285
Electricidad Biogas							0.809												0.809
Electricidad Bagazo							42.16												42.16
Electricidad distribuida													773.228						773.228
Electricidad Importada																		1.42343	1.42343
Bagazo de caña RW distribuida															55.34				55.34
Leña RW distribuida															262.049				262.049
BIOMASA SECUNDARIA IMPORTADA																			0
Solar RW																			0
Productos derivados de petroleo para uso no energetico		106.347	85.3336																191.681

## Sheet: Table S3 - Energy SUT 2012
	Coke ovens	Oil refineries	Gas works	Coal plant	Thermoelectric power plant	Independent power producer	Cogeneration	Nuclear plants	Hydroelectric power plant	Geothermal power plant	Wind power plant	Solar energy power plant	Electric grid	Distribution of imported carriers	Biomass distribution		Primary	Iron and steel	Chemical	Sugar	Cement	Mining	Paper and pulp	Glass	Beer	Fertilizers	Automotive	Water	Construction	Rubber	Petrochemical	Road transport	Transport aviation	Transport navigation	Rail transport	Transport electric	Tobacco	Other industry	Commercial	Services public	Residential		Aggregated finald demand	Exports	Statistical differences	Stock changes	Total
USE
Coal	178.472			364.122																																							0	6.34569	1.32	-24.1541	526.106
Crude oil		2813.23																																									0	2946.21	106.77	52.6442	5918.86
Condensates		3.31769	71.234																																								0	9.91144	-1e-06	3.22933	87.6924
Natural gas raw			903.047		444.588	620.329	150.72																																				0		-106.92	17.5381	2029.3
Nuclear energy								91.317																																			0				91.317
Hydro									114.68																																		0				114.68
Geothermal										133.142																																	0				133.142
Solar energy							0.242183					5.21																															0				5.45218
Wind energy											0.02																																0				0.02
Biogas							1.822																																				0				1.822
Peat							52.88								40.99																												0			1.21	95.08
Wood															256.743																												0				256.743
Coal distributed							3.71054														5.41																	91.95					97.36			0.016742	101.087
Coke																		64.3357																									64.3357	8.409		5.43	78.1747
LPG							0.895434										6.24538	0.005	0.83	0.00042	0.00024	6.12	0.39	0.15	0.8		0.52	1.25		0.01		50.51						30.89	65.11		274.37		437.201	0.173251	5.07627	2.90684	446.253
Gasoline																																1505.69	0.87										1506.56	130.072	24.563	13.7362	1674.93
Kerosene																	0.018857																120.31								1.2		121.529	0	0.113906		121.643
Diesel					25.288	0.635742	3.17919										113.246	0.88	4.17	0	0.22	12.08	1.26	0.15	0.13	0.15	0.78	3.51	11.41	1.95	0.39	558.14		32.3	26.21			27.85	4.24				799.066	0	-4e-06	66.0343	894.203
Fueloil		55.5897			454.741		7.93078											4.5	5.15	3.45	1.47	2.3	5.01	3.6	3.16			1.02		0.67	0.23						0.0087	2.43					32.9987	161.417	-1e-06	23.5125	736.19
Petroleum coke							38.3944											2.47172	1.76		90.63			0.0055														5.14					100.007	22.2844	0	24.4062	185.092
Natural Gas distributed			-23.2536				9.02947											112.34	61.49		8.14	9.4	28.9	28.21	8.4	0.47	4.12	1.14		5.49	101.27	0.68					0.3	161.62	10.28		32.05		574.3		541.661	60.8972	1162.63
Other oil derivatives																																											0				0
Coke imported														10.3664																																	10.3664
LPG imported														130.837																																	130.837
Gasoline imported														755.482																	0.2							0.2									755.482
Kerosene imported														6.61437																																	6.61437
Diesel imported														274.713																																	274.713
Fueloil imported														103.286																																	103.286
Petroleum coke imported														103.216																																	103.216
Natural Gas imported														841.359																																	841.359
Other oil derivatives imported																																															0
Electricity coal													60.052																														0				60.052
Electricity thermoelectric													762.572																														0				762.572
Electricity nuclear													37.8																														0				37.8
Electricity hydro													114.68																														0				114.68
Electricity geothermal													22.62																														0				22.62
Electricity wind													15.21																														0				15.21
Electricity solar													0.242183																									0.29	2.46		2.46		5.21				5.45218
Electricity biogas													1.822																														0				1.822
Electricity peat													52.88																																		52.88
Electricity distributed					52.3274												38.93	23.34	17.01	3.03	33.65	30.88	10.03	4.28	3.64	0.48	7.65	3.03	1.78	1.65	4.7				0.16	3.9	0.23	382.57	50.4	30.19	189.97		841.5	23.6941		-8.22	909.302
Electricity imported													8.43239																														0				8.43239
Peat distributed																				37.08																		3.91					40.99				40.99
Wood distributed																																									256.74		256.74				256.74
Other biomass imported																																											0				0
Solar decentralized																																											0				0
Non-energy oil derivatives														0																	76.423							82.82					159.243	3.24112	6.38541	0.877969	169.747
SUPPLY	Coke ovens	Oil refineries	Gas works	Coal plant	Thermoelectric power plant	Independent power producer	Cogeneration	Nuclear plants	Hydroelectric power plant	Geothermal power plant	Wind power plant	Solar energy power plant	Electric grid	Distribution of imported carriers	Biomass distribution		Domestic natural resources	Imports	Total
Carbón																	310.805	215.309	526.114
Petróleo crudo HC																	5918.86	0	5918.86
Condensados HC																	87.6924	0.297	87.9894
Gas natural HC																	2029.11		2029.11
Nucleoenergía																	91.317		91.317
Hidroenergía RW																	114.688		114.688
Geoenergía RW																	133.142		133.142
Energía solar RW																	5.21		5.21
Energía eólica RW																	0.02		0.02
Biogas RW																	1.822		1.822
Bagazo de caña BM																	95.08		95.08
Leña BM																	256.743		256.743
Carbón DISTRIBUIDO	101.079																		101.079
Coque de carbón RW	57.446													10.3664			10.3664		78.1788
GLP HC		46.4049	269.003											130.837					446.245
Gasolinas y naftas HC		783.848	135.605											755.482					1674.94
Querosenos HC		114.877	0											6.61437					121.491
Diesel HC		619.568	0											274.713					894.281
Combustóleo HC		632.918												103.286					736.204
Coque de petróleo RW		81.8932												103.216					185.109
Gas seco HC		129.306	192.059											841.359					1162.72
Productos fosiles secundarios otros																			0
Coque de carbón RW imp																		10.3664	10.3664
GLP HC imp																		130.837	130.837
Gasolinas y naftas HC imp																		755.482	755.482
Querosenos Hcimp																		6.61437	6.61437
Diesel HC imp																		274.713	274.713
Combustóleo HC imp																		103.286	103.286
Coque de petróleo RW imp																		103.216	103.216
Gas seco HC imp																		841.359	841.359
Productos fosiles secundarios otros imp																			0
Electricidad carbon				60.052															60.052
Electricidad TE					409.306	299.59	53.6758												762.572
Electricidad Nucleo								37.8											37.8
Electricidad Hidro									114.68										114.68
Electricidad Geo										22.62									22.62
Electricidad Eolica							15.19				0.02								15.21
Electricidad Solar							0.242183					5.21							5.45218
Electricidad Biogas							1.822												1.822
Electricidad Bagazo							52.88												52.88
Electricidad distribuida													909.298						909.298
Electricidad Importada																		8.43239	8.43239
Bagazo de caña RW distribuida															40.99				40.99
Leña RW distribuida															256.743				256.743
BIOMASA SECUNDARIA IMPORTADA																			0
Solar RW																			0
Productos derivados de petroleo para uso no energetico		82.1326	87.6235											0					169.756
